# Supplementary material for: Recurrent Horizontal Transfer of Bacterial Toxin Genes to Eukaryotes
Source: PubMed Central journal article supplement — Mol Biol Evol. 2012 Mar 12;29(9):2223–30. doi: 10.1093/molbev/mss089 (PMC3424411; doi:10.1093/molbev/mss089), 2012-03-12
Supplement: supp_mss089_MSS089_Supplemental_information_Figure_S1.pdf [file supp_mss089_MSS089_Supplemental_information_Figure_S1.pdf]

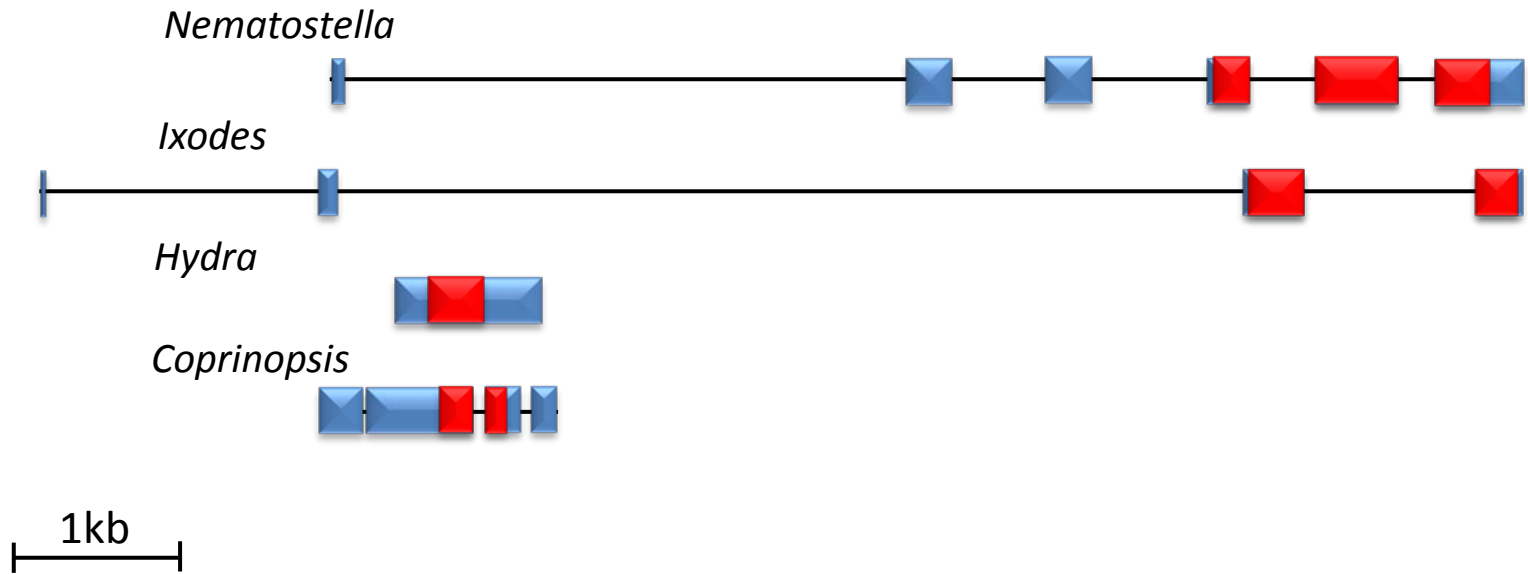

Fig. S1. Gene structures of Aerolysin homologues from *Nematostella vectensis* (sea anemone; GI 156403083), *Hydra magnipapillata* (hydra; GI 221104132), *Ixodes scapularis* (tick; GI 241568118) and *Coprinopsis cinerea* (basidiomycete fungus; GI 299746325). Boxes represent exons and lines represent introns. The red background corresponds to exon regions encoding amino acids with homology to a pore-forming toxin domain.
